# Supplementary material for: Opportunities for Pharmacogenetic Testing to Guide Dosing of Medications in Youths With Medicaid
Source: PubMed Central journal article supplement (PMC10865156; doi:10.1001/jamanetworkopen.2023.55707), 2024-02-13
Supplement: jamanetwopen-e2355707-s001.pdf [file jamanetwopen-e2355707-s001.pdf]

## Supplemental Online Content

Tang Girdwood S, Hall M, Antoon JW, et al. Opportunities for pharmacogenetic testing to guide dosing of medications in youths with Medicaid. *JAMA Netw Open*. 2024;7(2):e2355707. doi:10.1001/jamanetworkopen.2023.55707

**eTable 1.** Clinical Pharmacogenetics Implementation Consortium Level A Drugs Queried in August 2022 and Associated Genes

**eTable 2.** Prevalence of Dispensings for Drugs With High Level of Pharmacogenetic Evidence Among Youths with Medicaid 2011-2019

This supplemental material has been provided by the authors to give readers additional information about their work.

**Supplementary Table 1: List of CPIC Level A Drugs Queried in August 2022 and Their Associated Genes**

| <b>CPIC Level A Drug</b> | <b>Associated Level A Gene(s)</b> |
|--------------------------|-----------------------------------|
| abacavir                 | HLA-B                             |
| allopurinol              | HLA-B                             |
| amikacin                 | MT-RNR1                           |
| amitriptyline            | CYP2C19, CYP2D6                   |
| atazanavir               | UGT1A1                            |
| atomoxetine              | CYP2D6                            |
| atorvastatin             | SLCO1B1                           |
| azathioprine             | NUDT15, TPMT                      |
| capecitabine             | DPYD                              |
| carbamazepine            | HLA-A, HLA-B                      |
| celecoxib                | CYP2C9                            |
| citalopram               | CYP2C19                           |
| clopidogrel              | CYP2C19                           |
| codeine                  | CYP2D6                            |
| desflurane               | CACNA1S, RYR1                     |
| efavirenz                | CYP2B6                            |
| enflurane                | CACNA1S, RYR1                     |
| escitalopram             | CYP2C19                           |
| fluorouracil             | DPYD                              |
| flurbiprofen             | CYP2C9                            |
| fluvastatin              | CYP2C9, SLCO1B1                   |
| fosphenytoin             | CYP2C9, HLA-B                     |
| gentamicin               | MT-RNR1                           |
| halothane                | CACNA1S, RYR1                     |
| ibuprofen                | CYP2C9                            |
| irinotecan               | UGT1A1                            |
| isoflurane               | CACNA1S, RYR1                     |
| ivacaftor                | CFTR                              |
| kanamycin                | MT-RNR1                           |
| lansoprazole             | CYP2C19                           |
| lornoxicam               | CYP2C9                            |
| lovastatin               | SLCO1B1                           |
| meloxicam                | CYP2C9                            |
| mercaptopurine           | NUDT15, TPMT                      |
| methoxyflurane           | CACNA1S, RYR1                     |

|                       |                        |
|-----------------------|------------------------|
| nortriptyline         | CYP2D6                 |
| omeprazole            | CYP2C19                |
| ondansetron           | CYP2D6                 |
| oxcarbazepine         | HLA-B                  |
| pantoprazole          | CYP2C19                |
| paromomycin           | MT-RNR1                |
| paroxetine            | CYP2D6                 |
| peginterferon_alfa_2a | IFNL3, IFNL4           |
| peginterferon_alfa_2b | IFNL3, IFNL4           |
| phenytoin             | CYP2C9, HLA-B          |
| piroxicam             | CYP2C9                 |
| pitavastatin          | SLCO1B1                |
| pitolisant            | CYP2D6                 |
| plazomicin            | MT-RNR1                |
| pravastatin           | SLCO1B1                |
| rasburicase           | G6PD                   |
| rosuvastatin          | ABCG2, SLCO1B1         |
| sertraline            | CYP2C19                |
| sevoflurane           | CACNA1S, RYR1          |
| simvastatin           | SLCO1B1                |
| siponimod             | CYP2C9                 |
| streptomycin          | MT-RNR1                |
| succinylcholine       | CACNA1S, RYR1          |
| tacrolimus            | CYP3A5                 |
| tafenoquine           | G6PD                   |
| tamoxifen             | CYP2D6                 |
| tenoxicam             | CYP2C9                 |
| thioguanine           | NUDT15, TPMT           |
| tobramycin            | MT-RNR1                |
| tramadol              | CYP2D6                 |
| tropisetron           | CYP2D6                 |
| voriconazole          | CYP2C19                |
| warfarin              | CYP2C9, CYP4F2, VKORC1 |

**Supplementary Table 2: Prevalence of Dispensings for PGx Drugs Among Children with Medicaid from 2011-2019**

|                                                                             | 2011        | 2012        | 2013        | 2014        | 2015        | 2016        | 2017        | 2018        | 2019        |
|-----------------------------------------------------------------------------|-------------|-------------|-------------|-------------|-------------|-------------|-------------|-------------|-------------|
| <b>N (entire population queried)</b>                                        | 2,078,683   | 3,038,981   | 2,727,587   | 4,387,875   | 4,538,116   | 4,591,241   | 4,641,494   | 3,778,285   | 4,126,349   |
| <b>N (number of patients dispensed at least 1 PGx drug)</b>                 | 289,709     | 436,886     | 421,211     | 665,286     | 728,417     | 729,543     | 747,192     | 624,235     | 740,072     |
| <b>% of population queried dispensed at least 1 PGx drug</b>                | 13.9%       | 14.4%       | 15.4%       | 15.2%       | 16.1%       | 15.9%       | 16.1%       | 16.5%       | 17.9%       |
| <b>Number of patients dispensed the following (% of population queried)</b> |             |             |             |             |             |             |             |             |             |
| <b>abacavir</b>                                                             | 83 (0)      | 106 (0)     | 99 (0)      | 117 (0)     | 132 (0)     | 131 (0)     | 125 (0)     | 93 (0)      | 90 (0)      |
| <b>allopurinol</b>                                                          | 46 (0)      | 63 (0)      | 53 (0)      | 102 (0)     | 113 (0)     | 137 (0)     | 157 (0)     | 158 (0)     | 150 (0)     |
| <b>amikacin</b>                                                             | 5 (0)       | 20 (0)      | 18 (0)      | 35 (0)      | 41 (0)      | 45 (0)      | 46 (0)      | 47 (0)      | 50 (0)      |
| <b>amitriptyline</b>                                                        | 4581 (0.2)  | 6532 (0.2)  | 6387 (0.2)  | 10019 (0.2) | 11010 (0.2) | 11368 (0.2) | 11293 (0.2) | 8674 (0.2)  | 8918 (0.2)  |
| <b>atazanavir</b>                                                           | 45 (0)      | 62 (0)      | 56 (0)      | 68 (0)      | 56 (0)      | 46 (0)      | 29 (0)      | 12 (0)      | 12 (0)      |
| <b>atomoxetine</b>                                                          | 10765 (0.5) | 15671 (0.5) | 14007 (0.5) | 21329 (0.5) | 21706 (0.5) | 21591 (0.5) | 21419 (0.5) | 17439 (0.5) | 19088 (0.5) |
| <b>atorvastatin</b>                                                         | 141 (0)     | 172 (0)     | 238 (0)     | 458 (0)     | 568 (0)     | 676 (0)     | 736 (0)     | 635 (0)     | 687 (0)     |
| <b>azathioprine</b>                                                         | 105 (0)     | 132 (0)     | 140 (0)     | 285 (0)     | 528 (0)     | 538 (0)     | 495 (0)     | 385 (0)     | 457 (0)     |
| <b>capecitabine</b>                                                         | 0 (0)       | 2 (0)       | 0 (0)       | 1 (0)       | 0 (0)       | 0 (0)       | 0 (0)       | 1 (0)       | 1 (0)       |
| <b>carbamazepine</b>                                                        | 2717 (0.1)  | 3347 (0.1)  | 2627 (0.1)  | 2980 (0.1)  | 2668 (0.1)  | 2257 (0)    | 1858 (0)    | 1388 (0)    | 1234 (0)    |
| <b>celecoxib</b>                                                            | 157 (0)     | 241 (0)     | 197 (0)     | 336 (0)     | 283 (0)     | 409 (0)     | 456 (0)     | 376 (0)     | 455 (0)     |
| <b>citalopram</b>                                                           | 6930 (0.3)  | 8909 (0.3)  | 7144 (0.3)  | 10485 (0.2) | 12436 (0.3) | 12560 (0.3) | 12233 (0.3) | 9641 (0.3)  | 9514 (0.2)  |
| <b>clopidogrel</b>                                                          | 21 (0)      | 44 (0)      | 46 (0)      | 69 (0)      | 71 (0)      | 73 (0)      | 87 (0)      | 80 (0)      | 119 (0)     |
| <b>codeine</b>                                                              | 77805 (3.7) | 98381 (3.2) | 70836 (2.6) | 87858 (2)   | 80092 (1.8) | 65118 (1.4) | 44799 (1)   | 16312 (0.4) | 10965 (0.3) |
| <b>desflurane</b>                                                           | 0 (0)       | 0 (0)       | 0 (0)       | 0 (0)       | 6 (0)       | 49 (0)      | 19 (0)      | 10 (0)      | 51 (0)      |
| <b>efavirenz</b>                                                            | 61 (0)      | 54 (0)      | 48 (0)      | 54 (0)      | 43 (0)      | 28 (0)      | 18 (0)      | 10 (0)      | 9 (0)       |
| <b>enflurane</b>                                                            | 0 (0)       | 0 (0)       | 0 (0)       | 0 (0)       | 0 (0)       | 0 (0)       | 0 (0)       | 0 (0)       | 0 (0)       |
| <b>escitalopram</b>                                                         | 4117 (0.2)  | 6488 (0.2)  | 6603 (0.2)  | 12304 (0.3) | 14466 (0.3) | 16704 (0.4) | 19198 (0.4) | 18010 (0.5) | 22309 (0.5) |
| <b>fluorouracil</b>                                                         | 0 (0)       | 2 (0)       | 1 (0)       | 0 (0)       | 0 (0)       | 1 (0)       | 1 (0)       | 0 (0)       | 0 (0)       |
| <b>flurbiprofen</b>                                                         | 57 (0)      | 81 (0)      | 54 (0)      | 92 (0)      | 55 (0)      | 41 (0)      | 33 (0)      | 20 (0)      | 8 (0)       |
| <b>fluvastatin</b>                                                          | 0 (0)       | 0 (0)       | 0 (0)       | 0 (0)       | 1 (0)       | 2 (0)       | 0 (0)       | 0 (0)       | 0 (0)       |
| <b>fosphenytoin</b>                                                         | 0 (0)       | 0 (0)       | 10 (0)      | 13 (0)      | 17 (0)      | 15 (0)      | 16 (0)      | 15 (0)      | 23 (0)      |
| <b>gentamicin</b>                                                           | 155 (0)     | 196 (0)     | 189 (0)     | 301 (0)     | 273 (0)     | 280 (0)     | 249 (0)     | 183 (0)     | 199 (0)     |

|                       |             |              |              |              |              |              |              |              |              |
|-----------------------|-------------|--------------|--------------|--------------|--------------|--------------|--------------|--------------|--------------|
| halothane             | 0 (0)       | 0 (0)        | 0 (0)        | 0 (0)        | 0 (0)        | 0 (0)        | 0 (0)        | 0 (0)        | 0 (0)        |
| ibuprofen             | 94436 (4.5) | 130821 (4.3) | 122779 (4.5) | 225254 (5.1) | 271531 (6)   | 284622 (6.2) | 312753 (6.7) | 288602 (7.6) | 371749 (9)   |
| irinotecan            | 5 (0)       | 11 (0)       | 8 (0)        | 13 (0)       | 17 (0)       | 15 (0)       | 17 (0)       | 14 (0)       | 18 (0)       |
| isoflurane            | 0 (0)       | 0 (0)        | 0 (0)        | 0 (0)        | 0 (0)        | 0 (0)        | 0 (0)        | 0 (0)        | 0 (0)        |
| ivacaftor             | 0 (0)       | 29 (0)       | 26 (0)       | 47 (0)       | 146 (0)      | 214 (0)      | 338 (0)      | 366 (0)      | 559 (0)      |
| kanamycin             | 0 (0)       | 0 (0)        | 0 (0)        | 0 (0)        | 0 (0)        | 0 (0)        | 0 (0)        | 0 (0)        | 0 (0)        |
| lansoprazole          | 7106 (0.3)  | 17897 (0.6)  | 16080 (0.6)  | 23005 (0.5)  | 19450 (0.4)  | 16905 (0.4)  | 13033 (0.3)  | 8267 (0.2)   | 8152 (0.2)   |
| lornoxicam            | 0 (0)       | 0 (0)        | 0 (0)        | 0 (0)        | 0 (0)        | 0 (0)        | 0 (0)        | 0 (0)        | 0 (0)        |
| lovastatin            | 82 (0)      | 80 (0)       | 58 (0)       | 61 (0)       | 57 (0)       | 38 (0)       | 39 (0)       | 34 (0)       | 21 (0)       |
| meloxicam             | 2354 (0.1)  | 3897 (0.1)   | 4589 (0.2)   | 7452 (0.2)   | 7863 (0.2)   | 7854 (0.2)   | 8155 (0.2)   | 6418 (0.2)   | 6727 (0.2)   |
| mercaptopurine        | 472 (0)     | 673 (0)      | 652 (0)      | 874 (0)      | 947 (0)      | 949 (0)      | 926 (0)      | 786 (0)      | 782 (0)      |
| methoxyflurane        | 0 (0)       | 0 (0)        | 0 (0)        | 0 (0)        | 0 (0)        | 0 (0)        | 0 (0)        | 0 (0)        | 0 (0)        |
| nortriptyline         | 448 (0)     | 700 (0)      | 643 (0)      | 902 (0)      | 987 (0)      | 1138 (0)     | 1364 (0)     | 1141 (0)     | 1019 (0)     |
| omeprazole            | 11725 (0.6) | 24540 (0.8)  | 22929 (0.8)  | 37890 (0.9)  | 42550 (0.9)  | 42765 (0.9)  | 42802 (0.9)  | 35417 (0.9)  | 39261 (1)    |
| ondansetron           | 83292 (4)   | 150206 (4.9) | 176713 (6.5) | 275327 (6.3) | 304669 (6.7) | 303788 (6.6) | 319631 (6.9) | 266948 (7.1) | 314960 (7.6) |
| oxcarbazepine         | 6995 (0.3)  | 8873 (0.3)   | 10109 (0.4)  | 15877 (0.4)  | 15660 (0.3)  | 16993 (0.4)  | 17770 (0.4)  | 15513 (0.4)  | 17010 (0.4)  |
| pantoprazole          | 359 (0)     | 1212 (0)     | 1411 (0.1)   | 2787 (0.1)   | 3615 (0.1)   | 4443 (0.1)   | 3803 (0.1)   | 3225 (0.1)   | 4115 (0.1)   |
| paromomycin           | 9 (0)       | 8 (0)        | 7 (0)        | 11 (0)       | 7 (0)        | 4 (0)        | 19 (0)       | 3 (0)        | 19 (0)       |
| paroxetine            | 1176 (0.1)  | 1849 (0.1)   | 1829 (0.1)   | 2719 (0.1)   | 2747 (0.1)   | 2638 (0.1)   | 2613 (0.1)   | 2256 (0.1)   | 2386 (0.1)   |
| peginterferon_alfa_2a | 0 (0)       | 4 (0)        | 5 (0)        | 1 (0)        | 0 (0)        | 1 (0)        | 1 (0)        | 0 (0)        | 0 (0)        |
| peginterferon_alfa_2b | 0 (0)       | 0 (0)        | 0 (0)        | 0 (0)        | 2 (0)        | 5 (0)        | 5 (0)        | 3 (0)        | 5 (0)        |
| phenytoin             | 411 (0)     | 455 (0)      | 363 (0)      | 466 (0)      | 391 (0)      | 344 (0)      | 302 (0)      | 195 (0)      | 192 (0)      |
| piroxicam             | 156 (0)     | 169 (0)      | 121 (0)      | 122 (0)      | 104 (0)      | 67 (0)       | 51 (0)       | 13 (0)       | 10 (0)       |
| pitavastatin          | 0 (0)       | 0 (0)        | 0 (0)        | 0 (0)        | 0 (0)        | 0 (0)        | 0 (0)        | 0 (0)        | 0 (0)        |
| pitolisant            | 0 (0)       | 0 (0)        | 0 (0)        | 0 (0)        | 0 (0)        | 0 (0)        | 0 (0)        | 0 (0)        | 0 (0)        |
| plazomicin            | 0 (0)       | 0 (0)        | 0 (0)        | 0 (0)        | 0 (0)        | 0 (0)        | 0 (0)        | 0 (0)        | 0 (0)        |
| pravastatin           | 213 (0)     | 281 (0)      | 270 (0)      | 292 (0)      | 272 (0)      | 264 (0)      | 270 (0)      | 212 (0)      | 229 (0)      |
| rasburicase           | 0 (0)       | 0 (0)        | 0 (0)        | 0 (0)        | 0 (0)        | 0 (0)        | 0 (0)        | 0 (0)        | 0 (0)        |
| rosuvastatin          | 30 (0)      | 47 (0)       | 32 (0)       | 36 (0)       | 29 (0)       | 23 (0)       | 29 (0)       | 47 (0)       | 69 (0)       |
| sertraline            | 10801 (0.5) | 17341 (0.6)  | 17095 (0.6)  | 29610 (0.7)  | 37704 (0.8)  | 42536 (0.9)  | 46484 (1)    | 41470 (1.1)  | 48784 (1.2)  |
| sevoflurane           | 0 (0)       | 4 (0)        | 3 (0)        | 69 (0)       | 139 (0)      | 1199 (0)     | 888 (0)      | 959 (0)      | 1161 (0)     |

|                        |            |             |             |             |             |             |            |            |            |
|------------------------|------------|-------------|-------------|-------------|-------------|-------------|------------|------------|------------|
| <b>simvastatin</b>     | 307 (0)    | 412 (0)     | 344 (0)     | 403 (0)     | 321 (0)     | 261 (0)     | 265 (0)    | 207 (0)    | 211 (0)    |
| <b>siponimod</b>       | 0 (0)      | 0 (0)       | 0 (0)       | 0 (0)       | 0 (0)       | 0 (0)       | 0 (0)      | 0 (0)      | 0 (0)      |
| <b>streptomycin</b>    | 0 (0)      | 0 (0)       | 0 (0)       | 0 (0)       | 0 (0)       | 0 (0)       | 2 (0)      | 4 (0)      | 2 (0)      |
| <b>succinylcholine</b> | 3 (0)      | 6 (0)       | 6 (0)       | 138 (0)     | 290 (0)     | 398 (0)     | 275 (0)    | 388 (0)    | 418 (0)    |
| <b>tacrolimus</b>      | 533 (0)    | 795 (0)     | 773 (0)     | 1116 (0)    | 1132 (0)    | 1132 (0)    | 1148 (0)   | 1071 (0)   | 1271 (0)   |
| <b>tafenoquine</b>     | 0 (0)      | 0 (0)       | 0 (0)       | 0 (0)       | 0 (0)       | 0 (0)       | 0 (0)      | 0 (0)      | 0 (0)      |
| <b>tamoxifen</b>       | 10 (0)     | 15 (0)      | 8 (0)       | 22 (0)      | 20 (0)      | 25 (0)      | 37 (0)     | 31 (0)     | 36 (0)     |
| <b>tenoxicam</b>       | 0 (0)      | 0 (0)       | 0 (0)       | 0 (0)       | 0 (0)       | 0 (0)       | 0 (0)      | 0 (0)      | 0 (0)      |
| <b>thioguanine</b>     | 0 (0)      | 0 (0)       | 47 (0)      | 146 (0)     | 155 (0)     | 155 (0)     | 148 (0)    | 118 (0)    | 140 (0)    |
| <b>tobramycin</b>      | 616 (0)    | 844 (0)     | 688 (0)     | 1104 (0)    | 1072 (0)    | 1001 (0)    | 945 (0)    | 823 (0)    | 962 (0)    |
| <b>tramadol</b>        | 7136 (0.3) | 10886 (0.4) | 10112 (0.4) | 13918 (0.3) | 11742 (0.3) | 10190 (0.2) | 7801 (0.2) | 4041 (0.1) | 2910 (0.1) |
| <b>tropisetron</b>     | 0 (0)      | 0 (0)       | 0 (0)       | 0 (0)       | 0 (0)       | 0 (0)       | 0 (0)      | 0 (0)      | 0 (0)      |
| <b>voriconazole</b>    | 98 (0)     | 115 (0)     | 106 (0)     | 127 (0)     | 112 (0)     | 123 (0)     | 131 (0)    | 126 (0)    | 187 (0)    |
| <b>warfarin</b>        | 198 (0)    | 261 (0)     | 211 (0)     | 356 (0)     | 352 (0)     | 339 (0)     | 346 (0)    | 284 (0)    | 336 (0)    |
