# Supplementary material for: Opportunities for Pharmacogenetic Testing to Guide Dosing of Medications in Youths With Medicaid
Source: PubMed Central journal article supplement (PMC10865156; doi:10.1001/jamanetworkopen.2023.55707), 2024-02-13
Supplement: jamanetwopen-e2355707-s002.pdf [file jamanetwopen-e2355707-s002.pdf]

## **Data Sharing Statement**

Tang Girdwood. Opportunities for Pharmacogenetic Testing to Guide Dosing of Medications in Youths With Medicaid. *JAMA Netw Open*. Published online February 13, 2024. doi:10.1001/jamanetworkopen.2023.55707

### **Data**

**Data available:** No
